# Supplementary material for: Acquired interbacterial defense systems protect against interspecies antagonism in the human gut microbiome
Source: bioRxiv or medRxiv preprint supplement (doi:10.1101/471110), 2019-07-11
Supplement: Supplementary file [file 471110-1.pdf]

# Acquired interbacterial defense systems protect against interspecies antagonism in the human gut microbiome

Benjamin D. Ross<sup>1,\*</sup>, Adrian J. Verster<sup>2,\*</sup>, Matthew C. Radey<sup>1</sup>, Danica T. Schmidtke<sup>1</sup>, Christopher E. Pope<sup>3</sup>, Lucas R. Hoffman<sup>1,3,4</sup>, Adeline Hajjar<sup>5</sup>, S. Brook Peterson<sup>1</sup>, Elhanan Borenstein<sup>2,6,7,8,9,†</sup> and Joseph D. Mougous<sup>1,10,11,†</sup>

## **Supplemental Data Table 1:**

List of *B. fragilis*-specific type VI secretion system cognate immunity genes. Related to Fig. 1

## **Supplemental Data Table 2:**

List of orphan i6 and i7 immunity genes associated with AID-1 and -2 systems. Related to Fig 2.

## **Supplemental Data Table 3:**

Comprehensive list of genes within AID-1 and -2 systems; those with homology to cognate immunity are indicated along with the percent amino acid identity. Related to Fig. 2.

## **Supplemental Data Table 4:**

Comprehensive list of genes found within *r*AID-1 systems from six Bacteroidales strains. Related to Fig. 4.

## **Supplemental Data Table 5:**

List of all *r*AID-1 recombinase genes in Bacteroidales. Homology (tblastn e-value) with the *B. fragilis* NCTC 9343 *r*AID-1 recombinase is indicated, as well as the number of genes in the cluster. Related to Fig. 4 and Supplemental Fig. 4.

## **Supplemental Data Table 6:**

List of all strains, plasmids, and primers used in this study.

## Supplemental Data Table 1

List of *B. fragilis*- specific T6SS cognate immunity (GA3 subtype)

| <b>Immunity #</b> | <b>Immunity locus tag</b> | <b>Immunity accession</b> |
|-------------------|---------------------------|---------------------------|
| GA3_i1            | M117_RS0122600            | WP_008659772.1            |
| GA3_i2            | M117_RS11245              | WP_008659758.1            |
| GA3_i3            | M117_RS11255              | WP_008659747.1            |
| GA3_i4            | M074_RS10750              | WP_025814152.1            |
| GA3_i5            | M074_RS10805              | WP_011202655.1            |
| GA3_i6            | BF9343_1936               | WP_005787090.1            |
| GA3_i7            | BF9343_1927               | WP_010992797.1            |
| GA3_i8            | M068_2000                 | WP_005787075.1            |
| GA3_i9            | M065_2764                 | WP_005794673.1            |
| GA3_i10           | M065_2759                 | WP_005794684.1            |
| GA3_i11           | M069_2106                 | WP_009292150.1            |
| GA3_i12           | M069_2103                 | WP_032571500.1            |
| GA3_i13           | M073_1832                 | WP_032562840.1            |
| GA3_i14           | HMPREF1205_03575          | WP_005819890.1            |
| GA3_i15           | HMPREF1205_RS15320        | WP_005819898.1            |
| GA3_i16           | M068_RS11155              | WP_005787063.1            |

## Supplemental Data Table 2

Related to Fig 2. panels A and B. List of strain names and accessions

| Clade   | Abbreviation      | Strain                          | Genome accession | Immunity locus tag |
|---------|-------------------|---------------------------------|------------------|--------------------|
| i6-cI   | <i>B. fr</i> 32   | <i>B. fragilis</i> 321_BFRA     | GCF_001056335.1  | ADB44_RS08460      |
|         | <i>B. fr</i> I1   | <i>B. fragilis</i> I1345        | GCF_000598785.2  | M066_2029          |
|         | <i>B. fr</i> A7   | <i>B. fragilis</i> A7 (UDC12-2) | GCF_000598985.1  | M070_RS11175       |
|         | <i>B. fr</i> BO   | <i>B. fragilis</i> BOB25        | GCF_000965785.1  | VU15_RS08380       |
|         | <i>B. fr</i> J1   | <i>B. fragilis</i> J-143-4      | GCF_000598525.1  | M067_RS12915       |
|         | <i>B. fr</i> 9343 | <i>B. fragilis</i> NCTC 9343    | GCF_000025985.1  | BF9343_RS09445     |
|         | <i>B. fr</i> S2   | <i>B. fragilis</i> S24L34       | GCF_000599325.1  | M134_RS11155       |
|         | <i>B. fr</i> J3   | <i>B. fragilis</i> J38-1        | GCF_000598645.1  | M068_RS11090       |
| i6-cII  | <i>B. xy</i> H4   | <i>B. xylanisolvens</i> H204    | this study       | n.a.               |
|         | <i>B. xy</i> H207 | <i>B. xylanisolvens</i> H207    | this study       | n.a.               |
| i6-cIII | <i>B. ov</i> 3725 | <i>B. ovatus</i> 3725 D1 iv     | GCF_000699725.1  | M088_RS11470       |
|         | <i>B. fr</i> 638R | <i>B. fragilis</i> 638R         | GCF_000210835.1  | BF638R_RS09610     |
|         | <i>B. fr</i> DC   | <i>B. fragilis</i> DCMOUH0042B  | GCF_000724795.1  | HR50_RS01170       |
|         | <i>B. fr</i> 35   | <i>B. fragilis</i> 3_2_5        | GCF_000159855.2  | BSHG_RS08305       |
|         | <i>B. fr</i> 3986 | <i>B. fragilis</i> 3986 T(B)9   | GCF_000598465.1  | M083_RS12250       |
| i7-cl   | <i>B. fr</i> JC   | <i>B. fragilis</i> JCM 11017    | GCF_000613425.1  | n.a.               |
|         | <i>B. fr</i> 9343 | <i>B. fragilis</i> NCTC 9343    | GCF_000025985.1  | BF9343_RS09400     |
|         | <i>B. fr</i> BE   | <i>B. fragilis</i> BE1          | GCF_001286525.1  | BN2301_RS09100     |
| i7-cIII | <i>B. fr</i> 638R | <i>B. fragilis</i> 638R         | GCF_000210835.1  | BF638R_RS09665     |
|         | <i>B. ov</i> 3725 | <i>B. ovatus</i> 3725 D1 iv     | GCF_000699725.1  | M088_RS11485       |
| i7-cIV  | <i>B. fr</i> 3986 | <i>B. fragilis</i> 3986 T(B)9   | GCF_000598465.1  | M083_RS12280       |
|         | <i>B. fr</i> N3   | <i>B. fragilis</i> 3986 N3      | GCF_000601115.1  | M113_RS10845       |
|         | <i>B. fr</i> 10   | <i>B. fragilis</i> 1007-1-F #4  | GCF_000598545.2  | M147_RS11600       |
|         | <i>B. fr</i> DC   | <i>B. fragilis</i> DCMOUH0042B  | GCF_000724795.1  | HR50_RS06680       |

Supplemental Data Table 3

*B. fragilis* orphan immunity in GREEN

**AID-1 gene clusters**

| <b>Actinobacteria fragilis 43SR (cluster 1)</b> |                |                                |                 |                         |                         |                |                |                |                |                |                |                |                |                |                |
|-------------------------------------------------|----------------|--------------------------------|-----------------|-------------------------|-------------------------|----------------|----------------|----------------|----------------|----------------|----------------|----------------|----------------|----------------|----------------|
| Position in cluster                             | 1              | 2                              | 3               | 4                       | 5                       | 6              | 7              | 8              | 9              | 10             | 11             | 12             | 13             | 14             | 15             |
| Locus Tag                                       | BF43SR_RS09610 | BF43SR_RS09615                 | BF43SR_RS09620  | BF43SR_RS09625          | BF43SR_RS09630          | BF43SR_RS09635 | BF43SR_RS09640 | BF43SR_RS09645 | BF43SR_RS09650 | BF43SR_RS09655 | BF43SR_RS09660 | BF43SR_RS09665 | BF43SR_RS09670 | BF43SR_RS09675 | BF43SR_RS09680 |
| Identity (%) with cognate immunity              | n.a.           | n.a.                           | n.a.            | n.a.                    | n.a.                    | n.a.           | n.a.           | n.a.           | n.a.           | n.a.           | n.a.           | n.a.           | n.a.           | n.a.           | n.a.           |
| Homology                                        | GAT 4          | ToRb transcriptional regulator | YvaK anti-toxin | hypothetical pseudogene | hypothetical pseudogene | GAT 15         | hypothetical   | hypothetical   | hypothetical   | hypothetical   | GAT 17a        | GAT 17b        | GAT 17c        | GAT 17d        | GAT 17e        |

  

| <b>Actinobacteria fragilis 396 N3</b> |              |               |                                |                 |               |                         |              |              |              |              |              |              |               |              |              |
|---------------------------------------|--------------|---------------|--------------------------------|-----------------|---------------|-------------------------|--------------|--------------|--------------|--------------|--------------|--------------|---------------|--------------|--------------|
| Position in cluster                   | 1            | 2             | 3                              | 4               | 5             | 6                       | 7            | 8            | 9            | 10           | 11           | 12           | 13            | 14           | 15           |
| Locus Tag                             | M113_RS10873 | M113_RS102040 | M113_RS10870                   | M113_RS012045   | M113_RS012050 | M113_RS10885            | M113_RS10890 | M113_RS10885 | M113_RS10890 | M113_RS10895 | M113_RS10845 | M113_RS10840 | M113_RS012060 | M113_RS10835 | M113_RS10830 |
| Identity (%) with cognate immunity    | 87           | 56            | n.a.                           | n.a.            | 70            | n.a.                    | n.a.         | n.a.         | n.a.         | n.a.         | n.a.         | 100          | 78            | 41           | 87           |
| Homology                              | GAT 4        | GAT 4         | ToRb transcriptional regulator | YvaK anti-toxin | GAT 11        | hypothetical pseudogene | GAT 15       | hypothetical | hypothetical | hypothetical | hypothetical | GAT 17b      | GAT 17c       | GAT 17d      | GAT 17e      |

  

| <b>Actinobacteria fragilis 4C MDR100420</b> |              |               |                                |                       |               |              |              |              |              |              |              |              |              |              |
|---------------------------------------------|--------------|---------------|--------------------------------|-----------------------|---------------|--------------|--------------|--------------|--------------|--------------|--------------|--------------|--------------|--------------|
| Position in cluster                         | 1            | 2             | 3                              | 4                     | 5             | 6            | 7            | 8            | 9            | 10           | 11           | 12           | 13           | 14           |
| Locus Tag                                   | HR30_RS01170 | HR30_RS012045 | HR30_RS012050                  | HR30_RS012055         | HR30_RS012060 | HR30_RS01165 | HR30_RS01160 | HR30_RS01155 | HR30_RS01150 | HR30_RS06675 | HR30_RS06680 | HR30_RS06685 | HR30_RS06690 | HR30_RS06695 |
| Identity (%) with cognate immunity          | 87           | 56            | n.a.                           | n.a.                  | 98            | n.a.         | n.a.         | n.a.         | n.a.         | 100          | 100          | 78           | 41           | 87           |
| Homology                                    | GAT 4        | GAT 4         | ToRb transcriptional regulator | epithelial pseudogene | pseudogene    | hypothetical | GAT 15       | hypothetical | hypothetical | hypothetical | GAT 17a      | GAT 17b      | GAT 17c      | GAT 17d      |

  

| <b>Actinobacteria fragilis 396c TDR9</b> |              |                |                                |                 |                |                         |              |              |                |              |                |              |              |              |              |
|------------------------------------------|--------------|----------------|--------------------------------|-----------------|----------------|-------------------------|--------------|--------------|----------------|--------------|----------------|--------------|--------------|--------------|--------------|
| Position in cluster                      | 1            | 2              | 3                              | 4               | 5              | 6                       | 7            | 8            | 9              | 10           | 11             | 12           | 13           | 14           | 15           |
| Locus Tag                                | M083_RS12250 | M083_RS0121510 | M083_RS12255                   | M083_RS0121505  | M083_RS0121500 | M083_RS12260            | M083_RS12265 | M083_RS12270 | M083_RS0121495 | M083_RS12275 | M083_RS0121490 | M083_RS12280 | M083_RS12285 | M083_RS12290 | M083_RS12295 |
| Identity (%) with cognate immunity       | 87           | 56             | n.a.                           | n.a.            | 70             | n.a.                    | n.a.         | n.a.         | n.a.           | n.a.         | n.a.           | n.a.         | n.a.         | n.a.         | n.a.         |
| Homology                                 | GAT 4        | GAT 4          | ToRb transcriptional regulator | YvaK anti-toxin | GAT 11         | hypothetical pseudogene | GAT 15       | hypothetical | hypothetical   | hypothetical | hypothetical   | GAT 17a      | GAT 17b      | GAT 17c      | GAT 17d      |

  

| <b>Actinobacteria fragilis 3725 D14</b> |              |              |              |                |              |              |              |            |  |  |  |  |  |  |
|-----------------------------------------|--------------|--------------|--------------|----------------|--------------|--------------|--------------|------------|--|--|--|--|--|--|
| Position in cluster                     | 1            | 2            | 3            | 4              | 5            | 6            | 7            | 8          |  |  |  |  |  |  |
| Locus Tag                               | M083_RS11470 | M083_RS11475 | M083_RS11480 | M083_RS0120425 | M083_RS11485 | M083_RS11490 | M083_RS11495 |            |  |  |  |  |  |  |
| Identity (%) with cognate immunity      | 90           | n.a.         | n.a.         | n.a.           | 90           | 43           | pseudogene   | pseudogene |  |  |  |  |  |  |
| Homology                                | GAT 4        | hypothetical | hypothetical | GAT 17a        | GAT 17b      | GAT 15       | GAT 15       |            |  |  |  |  |  |  |

**AID-2 gene clusters**

| <b>Actinobacteria vulnificans H207</b> |                |                |                |
|----------------------------------------|----------------|----------------|----------------|
| Position in cluster                    | 1              | 2              | 3              |
| Locus Tag                              | E01DMPPF_04287 | E01DMPPF_04288 | E01DMPPF_04289 |
| Identity (%) with cognate immunity     | n.a.           | n.a.           | n.a.           |
| Homology                               | hypothetical   | GAT 15         | GAT 16         |

Note: Cluster is flanked by inverted repeats and associated with a DDE transposase consistent with an Insertion Sequence mobile element

**Other AID gene clusters**

| <b>Actinobacteria fragilis 43SR (cluster 2)</b> |                                |                 |                |                |                |                |                |                |                |                |                |                |                |                |                |
|-------------------------------------------------|--------------------------------|-----------------|----------------|----------------|----------------|----------------|----------------|----------------|----------------|----------------|----------------|----------------|----------------|----------------|----------------|
| Position in cluster                             | 1                              | 2               | 3              | 4              | 5              | 6              | 7              | 8              | 9              | 10             | 11             | 12             | 13             | 14             | 15             |
| Locus Tag                                       | BF43SR_RS08270                 | BF43SR_RS08275  | BF43SR_RS08280 | BF43SR_RS08285 | BF43SR_RS08290 | BF43SR_RS08295 | BF43SR_RS08300 | BF43SR_RS08305 | BF43SR_RS08310 | BF43SR_RS08315 | BF43SR_RS08320 | BF43SR_RS08325 | BF43SR_RS08330 | BF43SR_RS08335 | BF43SR_RS08340 |
| Identity (%) with cognate immunity              | n.a.                           | n.a.            | n.a.           | n.a.           | n.a.           | n.a.           | n.a.           | n.a.           | n.a.           | n.a.           | n.a.           | n.a.           | n.a.           | n.a.           | n.a.           |
| Homology                                        | ToRb transcriptional regulator | YvaK anti-toxin | GAT 15         | GAT 13         | hypothetical   | GAT 4          | hypothetical   | GAT 11         | hypothetical   | hypothetical   | GAT 11         | GAT 13         | GAT 4          | n.a.           | GAT 17a        |

  

| <b>Actinobacteria fragilis 397G18</b> |                                |                 |              |              |              |              |              |              |              |      |      |      |      |      |      |
|---------------------------------------|--------------------------------|-----------------|--------------|--------------|--------------|--------------|--------------|--------------|--------------|------|------|------|------|------|------|
| Position in cluster                   | 1                              | 2               | 3            | 4            | 5            | 6            | 7            | 8            | 9            | 10   | 11   | 12   | 13   | 14   | 15   |
| Locus Tag                             | M123_RS06740                   | M123_RS0122125  | M123_RS06735 | M123_RS06730 | M123_RS06725 | M123_RS06720 | M123_RS06715 | M123_RS06710 | M123_RS06705 |      |      |      |      |      |      |
| Identity (%) with cognate immunity    | n.a.                           | n.a.            | n.a.         | 85           | 93           | n.a.         | 80           | n.a.         | n.a.         | n.a. | n.a. | n.a. | n.a. | n.a. | n.a. |
| Homology                              | ToRb transcriptional regulator | YvaK anti-toxin | hypothetical | GAT 18       | GAT 16a      | hypothetical | GAT 4        | hypothetical | GAT 17a      |      |      |      |      |      |      |

  

| <b>Actinobacteria fragilis 3725 D14a</b> |                                |                 |              |              |              |              |              |              |              |              |              |              |              |      |      |
|------------------------------------------|--------------------------------|-----------------|--------------|--------------|--------------|--------------|--------------|--------------|--------------|--------------|--------------|--------------|--------------|------|------|
| Position in cluster                      | 1                              | 2               | 3            | 4            | 5            | 6            | 7            | 8            | 9            | 10           | 11           | 12           | 13           | 14   | 15   |
| Locus Tag                                | M107_RS11435                   | M107_RS11440    | M107_RS11425 | M107_RS11420 | M107_RS11415 | M107_RS11410 | M107_RS11405 | M107_RS11400 | M107_RS11395 | M107_RS11390 | M107_RS11385 | M107_RS11380 | M107_RS11375 |      |      |
| Identity (%) with cognate immunity       | n.a.                           | n.a.            | 61           | 100          | n.a.         | n.a.         | n.a.         | n.a.         | 90           | 79           | n.a.         | 65           | 65           | n.a. | n.a. |
| Homology                                 | ToRb transcriptional regulator | YvaK anti-toxin | GAT 15       | GAT 13       | hypothetical | hypothetical | GAT 4        | GAT 11       | GAT 13       | hypothetical | GAT 4        | hypothetical | GAT 17a      |      |      |

  

| <b>Actinobacteria vulnificans P36-108</b> |                                |                 |               |               |               |               |               |               |               |  |  |  |  |  |
|-------------------------------------------|--------------------------------|-----------------|---------------|---------------|---------------|---------------|---------------|---------------|---------------|--|--|--|--|--|
| Position in cluster                       | 1                              | 2               | 3             | 4             | 5             | 6             | 7             | 8             | 9             |  |  |  |  |  |
| Locus Tag                                 | BACHE_RS13600                  | BACHE_RS13595   | BACHE_RS13590 | BACHE_RS13585 | BACHE_RS13580 | BACHE_RS13575 | BACHE_RS13570 | BACHE_RS13565 | BACHE_RS13560 |  |  |  |  |  |
| Identity (%) with cognate immunity        | n.a.                           | n.a.            | n.a.          | n.a.          | n.a.          | n.a.          | n.a.          | n.a.          | n.a.          |  |  |  |  |  |
| Homology                                  | ToRb transcriptional regulator | YvaK anti-toxin | GAT 18        | GAT 10        | hypothetical  | hypothetical  | GAT 11        | hypothetical  | hypothetical  |  |  |  |  |  |

  

| <b>Actinobacteria coprococcus DSM 17136</b> |                                |                 |                 |                 |                 |                 |                 |                 |                 |  |  |  |  |  |
|---------------------------------------------|--------------------------------|-----------------|-----------------|-----------------|-----------------|-----------------|-----------------|-----------------|-----------------|--|--|--|--|--|
| Position in cluster                         | 1                              | 2               | 3               | 4               | 5               | 6               | 7               | 8               | 9               |  |  |  |  |  |
| Locus Tag                                   | BACCCOP_RS14550                | BACCCOP_RS14545 | BACCCOP_RS14540 | BACCCOP_RS14535 | BACCCOP_RS14530 | BACCCOP_RS14525 | BACCCOP_RS14520 | BACCCOP_RS14515 | BACCCOP_RS14510 |  |  |  |  |  |
| Identity (%) with cognate immunity          | n.a.                           | n.a.            | n.a.            | n.a.            | n.a.            | 65              | n.a.            | n.a.            | 69              |  |  |  |  |  |
| Homology                                    | AraC transcriptional regulator | hypothetical    | hypothetical    | hypothetical    | hypothetical    | GAT 13          | hypothetical    | hypothetical    | GAT 15          |  |  |  |  |  |

  

| <b>Actinobacteria coprococcus DSM 17136</b> |                 |                 |                 |                 |                 |                 |                 |                 |                 |                 |                 |  |  |  |
|---------------------------------------------|-----------------|-----------------|-----------------|-----------------|-----------------|-----------------|-----------------|-----------------|-----------------|-----------------|-----------------|--|--|--|
| Position in cluster                         | 1               | 2               | 3               | 4               | 5               | 6               | 7               | 8               | 9               | 10              | 11              |  |  |  |
| Locus Tag                                   | BACCCOP_RS03400 | BACCCOP_RS03405 | BACCCOP_RS03410 | BACCCOP_RS03415 | BACCCOP_RS03420 | BACCCOP_RS03425 | BACCCOP_RS03430 | BACCCOP_RS03435 | BACCCOP_RS03440 | BACCCOP_RS03445 | BACCCOP_RS03450 |  |  |  |
| Identity (%) with cognate immunity          | n.a.            | n.a.            | 69              | n.a.            | n.a.            | 64              | n.a.            | n.a.            | n.a.            | n.a.            | n.a.            |  |  |  |
| Homology                                    | DDE transposase | GAT 15          | GAT 15          | hypothetical    | hypothetical    | GAT 13          | hypothetical    | hypothetical    | hypothetical    | hypothetical    | hypothetical    |  |  |  |

  

| <b>Actinobacteria vulnificans 27983FDY 0834007</b> |               |               |               |               |               |                                |               |               |               |               |               |               |               |               |               |               |               |               |
|----------------------------------------------------|---------------|---------------|---------------|---------------|---------------|--------------------------------|---------------|---------------|---------------|---------------|---------------|---------------|---------------|---------------|---------------|---------------|---------------|---------------|
| Position in cluster                                | 1             | 2             | 3             | 4             | 5             | 6                              | 7             | 8             | 9             | 10            | 11            | 12            | 13            | 14            | 15            | 16            | 17            | 18            |
| Locus Tag                                          | ARB20_RS07450 | ARB20_RS07455 | ARB20_RS07460 | ARB20_RS07465 | ARB20_RS07470 | ARB20_RS07475                  | ARB20_RS07480 | ARB20_RS07485 | ARB20_RS07490 | ARB20_RS07495 | ARB20_RS07500 | ARB20_RS07505 | ARB20_RS07510 | ARB20_RS07515 | ARB20_RS07520 | ARB20_RS07525 | ARB20_RS07530 | ARB20_RS07535 |
| Identity (%) with cognate immunity                 | n.a.          | n.a.          | n.a.          | n.a.          | n.a.          | n.a.                           | n.a.          | n.a.          | n.a.          | 57            | n.a.          | 76            | 79            | n.a.          | 89            | n.a.          | n.a.          | n.a.          |
| Homology                                           | ToRb          | ToRb          | hypothetical  | hypothetical  | ToRb          | AraC transcriptional regulator | hypothetical  | hypothetical  | hypothetical  | GAT 13        | hypothetical  | GAT 15        | GAT 15        | hypothetical  | GAT 18        | hypothetical  | hypothetical  | hypothetical  |



Supplemental Data Table 5

| Strain                                             | Genome accession | Recombinase protein ID | e-value   | Number of genes in <i>rAID-1</i> cluster |
|----------------------------------------------------|------------------|------------------------|-----------|------------------------------------------|
| <i>Alistipes onderdonkii</i> WAL 8169 = DSM 19147  | GCF_000374505.1  | WP_004319196.1         |           | 0                                        |
| <i>Alistipes putredinis</i> DSM 17216              | GCF_000154465.1  | WP_004329685.1         | 1.00E-102 | 5                                        |
| <i>Alistipes shahii</i> WAL 8301                   | GCF_000210575.1  | WP_004319196.1         |           | 0                                        |
| <i>Bacteroides barnesiae</i> DSM 18169 = JCM 13652 | GCF_000374585.1  | WP_018709302.1         | 3.00E-99  | 9                                        |
| <i>Bacteroides caccae</i> CL03T12C61               | GCF_000273725.1  | WP_004319196.1         |           | 0                                        |
| <i>Bacteroides cellulosilyticus</i> WH2            | GCF_001318345.1  | WP_004319196.1         |           | 0                                        |
| <i>Bacteroides cellulosilyticus</i> WH2            | GCF_001318345.1  | WP_029427642.1         | 3.00E-104 | 15                                       |
| <i>Bacteroides cellulosilyticus</i> KLE1257        | GCF_001580105.1  | WP_032575359.1         | 5.00E-61  | 6                                        |
| <i>Bacteroides cellulosilyticus</i> KLE1257        | GCF_001580105.1  | WP_041579541.1         |           | 0                                        |
| <i>Bacteroides cellulosilyticus</i> WH2            | GCF_000463315.1  | WP_004319196.1         |           | 0                                        |
| <i>Bacteroides cellulosilyticus</i> WH2            | GCF_000463315.1  | WP_029427371.1         |           | 0                                        |
| <i>Bacteroides coprocola</i> DSM 17136             | GCF_000154845.1  | WP_007565622.1         |           | 0                                        |
| <i>Bacteroides coprocola</i> DSM 17136             | GCF_000154845.1  | WP_007566045.1         | 4.00E-27  | 2                                        |
| <i>Bacteroides dorei</i> CL02T00C15                | GCF_000273035.1  | WP_007845703.1         | 1.00E-103 | 7                                        |
| <i>Bacteroides dorei</i> CL02T12C06                | GCF_000273055.1  | WP_007845703.1         | 1.00E-103 | 7                                        |
| <i>Bacteroides dorei</i> CL03T12C01                | GCF_000273075.1  | WP_004319196.1         |           | 0                                        |
| <i>Bacteroides eggerthii</i> 1_2_48FAA             | GCF_000185605.1  | WP_034717210.1         |           | 0                                        |
| <i>Bacteroides eggerthii</i> 1_2_48FAA             | GCF_000273465.1  | WP_004319196.1         |           | 0                                        |
| <i>Bacteroides faecichinchillae</i> JCM 17102      | GCF_000614145.1  | WP_025073740.1         | 1.00E-28  | 2                                        |
| <i>Bacteroides finegoldii</i> CL09T03C10           | GCF_000269545.1  | WP_007762162.1         | 6.00E-28  | 2                                        |
| <i>Bacteroides finegoldii</i> DSM 17565            | GCF_000156195.1  | WP_007757814.1         | 7.00E-107 | 2                                        |
| <i>Bacteroides finegoldii</i> DSM 17565            | GCF_000156195.1  | WP_032532373.1         | 2.00E-102 | 9                                        |
| <i>Bacteroides fragilis</i>                        | GCF_000965785.1  | WP_032573111.1         | 2.00E-53  | 5                                        |
| <i>Bacteroides fragilis</i>                        | GCF_000965785.1  | WP_045899093.1         | 8.00E-102 | 7                                        |
| <i>Bacteroides fragilis</i>                        | GCF_001286525.1  | WP_053873782.1         | 4.00E-61  | 5                                        |
| <i>Bacteroides fragilis</i>                        | GCF_000710365.1  | WP_007480249.1         | 7.00E-103 | 3                                        |
| <i>Bacteroides fragilis</i>                        | GCF_000710365.1  | WP_032530216.1         | 1.00E-177 | 12                                       |
| <i>Bacteroides fragilis</i>                        | GCF_000710375.1  | WP_032541534.1         | 1.00E-180 | 14                                       |
| <i>Bacteroides fragilis</i>                        | GCF_000724665.1  | WP_044300451.1         | 8.00E-101 | 5                                        |
| <i>Bacteroides fragilis</i>                        | GCF_000724795.1  | WP_005817965.1         | 1.00E-56  | 5                                        |
| <i>Bacteroides fragilis</i>                        | GCF_000724805.1  | WP_032530216.1         | 1.00E-177 | 2                                        |
| <i>Bacteroides fragilis</i>                        | GCF_000724815.1  | WP_032539385.1         | 6.00E-178 | 14                                       |
| <i>Bacteroides fragilis</i>                        | GCF_001058755.1  | WP_009292164.1         | 7.00E-61  | 5                                        |
| <i>Bacteroides fragilis</i>                        | GCF_001580095.1  | WP_032575359.1         | 5.00E-61  | 6                                        |
| <i>Bacteroides fragilis</i>                        | GCF_001580095.1  | WP_041579541.1         |           | 0                                        |
| <i>Bacteroides fragilis</i>                        | GCF_001693695.1  | WP_032541534.1         | 1.00E-180 | 31                                       |
| <i>Bacteroides fragilis</i>                        | GCF_001699855.1  | WP_005800292.1         | 7.00E-52  | 6                                        |
| <i>Bacteroides fragilis</i>                        | GCF_001699865.1  | WP_009292164.1         | 7.00E-61  | 7                                        |
| <i>Bacteroides fragilis</i>                        | GCF_001816225.1  | WP_042986887.1         | 2.00E-60  | 5                                        |
| <i>Bacteroides fragilis</i>                        | GCF_001997325.1  | WP_041579541.1         |           | 0                                        |
| <i>Bacteroides fragilis</i> 3_1_12                 | GCF_000157015.1  | WP_032541534.1         | 1.00E-180 | 19                                       |
| <i>Bacteroides fragilis</i> 638R                   | GCF_000210835.1  | WP_014298729.1         | 1.00E-60  | 7                                        |
| <i>Bacteroides fragilis</i> 638R                   | GCF_000210835.1  | WP_041161350.1         | 3.00E-103 | 8                                        |
| <i>Bacteroides fragilis</i> CL03T00C08             | GCF_000273095.1  | WP_005787123.1         | 1.00E-60  | 7                                        |
| <i>Bacteroides fragilis</i> CL03T12C07             | GCF_000273115.1  | WP_005787123.1         | 1.00E-60  | 7                                        |
| <i>Bacteroides fragilis</i> CL03T12C07             | GCF_000273115.1  | WP_029427371.1         |           | 0                                        |
| <i>Bacteroides fragilis</i> CL03T12C07             | GCF_000273115.1  | WP_032532373.1         | 2.00E-102 | 11                                       |
| <i>Bacteroides fragilis</i> CL05T00C42             | GCF_000269525.1  | WP_005800292.1         | 7.00E-52  | 5                                        |
| <i>Bacteroides fragilis</i> CL05T00C42             | GCF_000273765.1  | WP_005800292.1         | 7.00E-52  | 5                                        |
| <i>Bacteroides fragilis</i> CL05T12C13             | GCF_000273135.1  | WP_005800292.1         | 7.00E-52  | 5                                        |
| <i>Bacteroides fragilis</i> CL07T00C01             | GCF_000263115.1  | WP_005794646.1         | 1.00E-60  | 5                                        |
| <i>Bacteroides fragilis</i> CL07T12C05             | GCF_000273155.1  | WP_005794646.1         | 1.00E-60  | 5                                        |
| <i>Bacteroides fragilis</i> HMW 610                | GCF_000297695.1  | WP_032538046.1         | 5.00E-179 | 15                                       |
| <i>Bacteroides fragilis</i> HMW 615                | GCF_000297735.1  | WP_005817965.1         | 1.00E-56  | 5                                        |
| <i>Bacteroides fragilis</i> NCTC 9343              | GCF_000025985.1  | WP_032575359.1         | 5.00E-61  | 5                                        |
| <i>Bacteroides fragilis</i> NCTC 9343              | GCF_000025985.1  | WP_041579541.1         |           | 0                                        |
| <i>Bacteroides fragilis</i> str. 1007-1-F #10      | GCF_000598685.2  | WP_032533094.1         | 2.00E-52  | 5                                        |
| <i>Bacteroides fragilis</i> str. 1007-1-F #3       | GCF_000599265.1  | WP_032533094.1         | 2.00E-52  | 6                                        |
| <i>Bacteroides fragilis</i> str. 1007-1-F #4       | GCF_000598545.2  | WP_032533094.1         | 2.00E-52  | 5                                        |
| <i>Bacteroides fragilis</i> str. 1007-1-F #5       | GCF_000601035.1  | WP_032533094.1         | 2.00E-52  | 6                                        |
| <i>Bacteroides fragilis</i> str. 1007-1-F #6       | GCF_000601095.1  | WP_032533094.1         | 2.00E-52  | 6                                        |
| <i>Bacteroides fragilis</i> str. 1007-1-F #7       | GCF_000599145.2  | WP_032533094.1         | 2.00E-52  | 5                                        |
| <i>Bacteroides fragilis</i> str. 1007-1-F #8       | GCF_000598265.1  | WP_032533094.1         | 2.00E-52  | 6                                        |
| <i>Bacteroides fragilis</i> str. 1007-1-F #9       | GCF_000598885.1  | WP_032533094.1         | 2.00E-52  | 6                                        |
| <i>Bacteroides fragilis</i> str. 1009-4-F #10      | GCF_000598705.1  | WP_032573111.1         | 2.00E-53  | 5                                        |
| <i>Bacteroides fragilis</i> str. 1009-4-F #7       | GCF_000599285.2  | WP_032573111.1         | 2.00E-53  | 4                                        |
| <i>Bacteroides fragilis</i> str. 2-F-2 #4          | GCF_000598825.1  | WP_032570367.1         | 3.00E-53  | 6                                        |
| <i>Bacteroides fragilis</i> str. 2-F-2 #5          | GCF_000598285.1  | WP_032570367.1         | 3.00E-53  | 5                                        |
| <i>Bacteroides fragilis</i> str. 2-F-2 #7          | GCF_000598145.1  | WP_032570367.1         | 3.00E-53  | 6                                        |
| <i>Bacteroides fragilis</i> str. 20793-3           | GCF_000598905.1  | WP_005800292.1         | 7.00E-52  | 6                                        |
| <i>Bacteroides fragilis</i> str. 3-F-2 #6          | GCF_000598865.1  | WP_032581328.1         | 4.00E-103 | 13                                       |
| <i>Bacteroides fragilis</i> str. 3-F-2 #6          | GCF_000598865.1  | WP_032581437.1         |           | 0                                        |
| <i>Bacteroides fragilis</i> str. 34-F-2 #13        | GCF_000598425.1  | WP_032570367.1         | 3.00E-53  | 7                                        |
| <i>Bacteroides fragilis</i> str. 3719 A10          | GCF_000598845.1  | WP_005817965.1         | 1.00E-56  | 5                                        |

|                                                     |                 |                |           |    |
|-----------------------------------------------------|-----------------|----------------|-----------|----|
| <i>Bacteroides fragilis</i> str. 3719 T6            | GCF_000598725.1 | WP_032591763.1 | 4.00E-61  | 5  |
| <i>Bacteroides fragilis</i> str. 3725 D9(v)         | GCF_000598585.1 | WP_011202667.1 | 5.00E-61  | 7  |
| <i>Bacteroides fragilis</i> str. 3725 D9(v)         | GCF_000598585.1 | WP_032588375.1 | 2.00E-103 | 7  |
| <i>Bacteroides fragilis</i> str. 3783N1-2           | GCF_000598325.1 | WP_032576242.1 | 3.00E-53  | 3  |
| <i>Bacteroides fragilis</i> str. 3783N1-6           | GCF_000599065.2 | WP_032576242.1 | 3.00E-53  | 5  |
| <i>Bacteroides fragilis</i> str. 3783N1-8           | GCF_000598605.1 | WP_032576242.1 | 3.00E-53  | 5  |
| <i>Bacteroides fragilis</i> str. 3986 N(B)19        | GCF_000598445.1 | WP_032583251.1 | 1.00E-62  | 5  |
| <i>Bacteroides fragilis</i> str. 3988 T1            | GCF_000598205.1 | WP_022347519.1 | 4.00E-51  | 7  |
| <i>Bacteroides fragilis</i> str. 3988T(B)14         | GCF_000598365.1 | WP_022347519.1 | 4.00E-51  | 2  |
| <i>Bacteroides fragilis</i> str. 3998T(B)3          | GCF_000598485.1 | WP_042971802.1 | 0         | 3  |
| <i>Bacteroides fragilis</i> str. A7 (UDC12-2)       | GCF_000598985.1 | WP_032573111.1 | 2.00E-53  | 5  |
| <i>Bacteroides fragilis</i> str. DS-166             | GCF_000598245.1 | WP_009292164.1 | 7.00E-61  | 7  |
| <i>Bacteroides fragilis</i> str. DS-208             | GCF_000598505.1 | WP_032569346.1 | 4.00E-53  | 5  |
| <i>Bacteroides fragilis</i> str. Ds-233             | GCF_000598805.1 | WP_009292164.1 | 7.00E-61  | 5  |
| <i>Bacteroides fragilis</i> str. DS-71              | GCF_000599085.1 | WP_032589960.1 | 2.00E-61  | 3  |
| <i>Bacteroides fragilis</i> str. I1345              | GCF_000598785.2 | WP_032573111.1 | 2.00E-53  | 4  |
| <i>Bacteroides fragilis</i> str. J-143-4            | GCF_000598525.1 | WP_032564756.1 | 6.00E-60  | 5  |
| <i>Bacteroides fragilis</i> str. J38-1              | GCF_000598645.1 | WP_009292164.1 | 7.00E-61  | 5  |
| <i>Bacteroides fragilis</i> str. S23 R14            | GCF_000598665.1 | WP_032562849.1 | 2.00E-59  | 6  |
| <i>Bacteroides fragilis</i> str. S23L17             | GCF_000601055.1 | WP_032562849.1 | 2.00E-59  | 5  |
| <i>Bacteroides fragilis</i> str. S23L24             | GCF_000599305.1 | WP_032562849.1 | 2.00E-59  | 6  |
| <i>Bacteroides fragilis</i> str. S24L15             | GCF_000599005.1 | WP_009292164.1 | 7.00E-61  | 7  |
| <i>Bacteroides fragilis</i> str. S24L15             | GCF_000599005.1 | WP_032568676.1 | 0         | 14 |
| <i>Bacteroides fragilis</i> str. S24L15             | GCF_000599005.1 | WP_032568998.1 | 5.00E-114 | 7  |
| <i>Bacteroides fragilis</i> str. S24L26             | GCF_000598745.1 | WP_009292164.1 | 7.00E-61  | 7  |
| <i>Bacteroides fragilis</i> str. S24L26             | GCF_000598745.1 | WP_032568676.1 | 0         | 14 |
| <i>Bacteroides fragilis</i> str. S24L26             | GCF_000598745.1 | WP_032568998.1 | 5.00E-114 | 7  |
| <i>Bacteroides fragilis</i> str. S24L34             | GCF_000599325.1 | WP_009292164.1 | 7.00E-61  | 7  |
| <i>Bacteroides fragilis</i> str. S24L34             | GCF_000599325.1 | WP_032568676.1 | 0         | 14 |
| <i>Bacteroides fragilis</i> str. S24L34             | GCF_000599325.1 | WP_032568998.1 | 5.00E-114 | 7  |
| <i>Bacteroides fragilis</i> str. S36L11             | GCF_000599125.1 | WP_009292164.1 | 7.00E-61  | 4  |
| <i>Bacteroides fragilis</i> str. S36L12             | GCF_000599345.1 | WP_009292164.1 | 7.00E-61  | 5  |
| <i>Bacteroides fragilis</i> str. S36L5              | GCF_000599025.1 | WP_009292164.1 | 7.00E-61  | 5  |
| <i>Bacteroides fragilis</i> str. S38L3              | GCF_000598765.2 | WP_032575359.1 | 5.00E-61  | 5  |
| <i>Bacteroides fragilis</i> str. S38L5              | GCF_000599365.1 | WP_032575359.1 | 5.00E-61  | 6  |
| <i>Bacteroides fragilis</i> str. S6L3               | GCF_000599225.1 | WP_009292164.1 | 7.00E-61  | 7  |
| <i>Bacteroides fragilis</i> str. S6L8               | GCF_000599385.1 | WP_009292164.1 | 7.00E-61  | 7  |
| <i>Bacteroides fragilis</i> str. S6R5               | GCF_000599045.1 | WP_009292164.1 | 7.00E-61  | 7  |
| <i>Bacteroides fragilis</i> str. S6R6               | GCF_000599245.1 | WP_009292164.1 | 7.00E-61  | 7  |
| <i>Bacteroides fragilis</i> str. S6R8               | GCF_000601075.2 | WP_009292164.1 | 7.00E-61  | 6  |
| <i>Bacteroides fragilis</i> YCH46                   | GCF_000009925.1 | YP_098675.1    | 2.00E-103 | 9  |
| <i>Bacteroides fragilis</i> YCH46                   | GCF_000009925.1 | YP_099248.1    | 5.00E-61  | 7  |
| <i>Bacteroides gallinarum</i> DSM 18171 = JCM 13651 | GCF_000374365.1 | WP_018668258.1 | 2.00E-100 | 9  |
| <i>Bacteroides gallinarum</i> DSM 18171 = JCM 13651 | GCF_000613665.1 | WP_018668258.1 | 2.00E-100 | 9  |
| <i>Bacteroides ihuae</i>                            | GCF_900104585.1 | WP_071147699.1 | 7.00E-28  | 2  |
| <i>Bacteroides intestinalis</i>                     | GCF_001578635.1 | WP_007565622.1 | 0         | 6  |
| <i>Bacteroides luti</i>                             | GCF_900128905.1 | WP_073402179.1 | 8.00E-24  | 2  |
| <i>Bacteroides nordii</i> CL02T12C05                | GCF_000273175.1 | WP_004319196.1 | 0         | 16 |
| <i>Bacteroides nordii</i> CL02T12C05                | GCF_000273175.1 | WP_007482838.1 | 2.00E-28  | 16 |
| <i>Bacteroides nordii</i> CL02T12C05                | GCF_000273175.1 | WP_044166385.1 | 3.00E-104 | 7  |
| <i>Bacteroides nordii</i> WAL 11050 = JCM 12987     | GCF_000613465.1 | WP_002558314.1 | 4.00E-25  | 20 |
| <i>Bacteroides oleiciplenus</i> YIT 12058           | GCF_000315485.1 | WP_009132147.1 | 0         | 15 |
| <i>Bacteroides ovatus</i>                           | GCF_001314995.1 | WP_004296526.1 | 1.00E-24  | 2  |
| <i>Bacteroides ovatus</i>                           | GCF_001535615.1 | WP_004317151.1 | 2.00E-25  | 2  |
| <i>Bacteroides ovatus</i>                           | GCF_001578575.1 | WP_022199412.1 | 3.00E-24  | 2  |
| <i>Bacteroides ovatus</i>                           | GCF_900100465.1 | WP_008646540.1 | 1.00E-24  | 2  |
| <i>Bacteroides ovatus</i>                           | GCF_900107475.1 | WP_004296526.1 | 1.00E-24  | 2  |
| <i>Bacteroides ovatus</i> 3_8_47FAA                 | GCF_000218325.1 | WP_004303812.1 | 0         | 5  |
| <i>Bacteroides ovatus</i> ATCC 8483                 | GCF_000154125.1 | WP_004296526.1 | 1.00E-24  | 2  |
| <i>Bacteroides ovatus</i> CL02T12C04                | GCF_000273195.1 | WP_004317151.1 | 2.00E-25  | 2  |
| <i>Bacteroides ovatus</i> CL02T12C04                | GCF_000273195.1 | WP_004319196.1 | 0         | 14 |
| <i>Bacteroides ovatus</i> CL03T12C18                | GCF_000273215.1 | WP_029427371.1 | 0         | 16 |
| <i>Bacteroides ovatus</i> CL03T12C18                | GCF_000273215.1 | WP_032532373.1 | 2.00E-102 | 11 |
| <i>Bacteroides ovatus</i> SD CMC 3f                 | GCF_000178275.1 | WP_004309994.1 | 1.00E-102 | 5  |
| <i>Bacteroides ovatus</i> str. 3725 D1 iv           | GCF_000699725.1 | WP_004319196.1 | 0         | 9  |
| <i>Bacteroides ovatus</i> str. 3725 D1 iv           | GCF_000699725.1 | WP_004319196.1 | 0         | 8  |
| <i>Bacteroides ovatus</i> str. 3725 D1 iv           | GCF_000699725.1 | WP_032588375.1 | 2.00E-103 | 10 |
| <i>Bacteroides ovatus</i> str. 3725 D9 iii          | GCF_000699665.1 | WP_004319196.1 | 0         | 10 |
| <i>Bacteroides ovatus</i> str. 3725 D9 iii          | GCF_000699665.1 | WP_029427371.1 | 0         | 5  |
| <i>Bacteroides ovatus</i> str. 3725 D9 iii          | GCF_000699665.1 | WP_032588375.1 | 2.00E-103 | 6  |
| <i>Bacteroides ovatus</i> V975                      | GCF_900095495.1 | WP_004296526.1 | 1.00E-24  | 2  |
| <i>Bacteroides paurosaccharolyticus</i> JCM 15092   | GCF_000613805.1 | WP_024993116.1 | 2.00E-28  | 4  |
| <i>Bacteroides plebeius</i> DSM 17135               | GCF_000187895.1 | WP_007558964.1 | 0         | 20 |
| <i>Bacteroides salanitronis</i> DSM 18170           | GCF_000190575.1 | WP_013619075.1 | 5.00E-101 | 14 |
| <i>Bacteroides sahyersiae</i>                       | GCF_001405695.1 | WP_004319196.1 | 0         | 9  |
| <i>Bacteroides sahyersiae</i> CL02T12C01            | GCF_000273235.1 | WP_007480249.1 | 7.00E-103 | 5  |
| <i>Bacteroides sahyersiae</i> WAL 10018 = DSM 18765 | GCF_000381365.1 | WP_005926302.1 | 3.00E-102 | 9  |

|                                                     |                 |                |           |    |
|-----------------------------------------------------|-----------------|----------------|-----------|----|
| <i>Bacteroides salyersiae</i> WAL 10018 = DSM 18765 | GCF_000381365.1 | WP_044097441.1 | 1.00E-103 | 7  |
| <i>Bacteroides salyersiae</i> WAL 10018 = DSM 18765 | GCF_000613685.1 | WP_005926302.1 | 3.00E-102 | 9  |
| <i>Bacteroides</i> sp. 1_1_30                       | GCF_000218365.1 | WP_008642435.1 | 4.00E-25  | 2  |
| <i>Bacteroides</i> sp. 2_1_22                       | GCF_000162155.1 | WP_004317151.1 | 2.00E-25  | 2  |
| <i>Bacteroides</i> sp. 2_1_56FAA                    | GCF_000218345.1 | WP_009292164.1 | 7.00E-61  | 8  |
| <i>Bacteroides</i> sp. 2_1_56FAA                    | GCF_000218345.1 | WP_032496509.1 | 4.00E-103 | 13 |
| <i>Bacteroides</i> sp. 2_2_4                        | GCF_000157055.1 | WP_008646540.1 | 1.00E-24  | 2  |
| <i>Bacteroides</i> sp. 3_1_13                       | GCF_001185845.1 | WP_004317151.1 | 2.00E-25  | 2  |
| <i>Bacteroides</i> sp. 3_1_23                       | GCF_000162555.1 | WP_008646540.1 | 1.00E-24  | 2  |
| <i>Bacteroides</i> sp. 3_1_23                       | GCF_000162555.1 | WP_032532373.1 | 2.00E-102 | 5  |
| <i>Bacteroides</i> sp. 3_2_5                        | GCF_000159855.2 | WP_005817965.1 | 1.00E-56  | 5  |
| <i>Bacteroides</i> sp. D1                           | GCF_000157095.2 | WP_004317151.1 | 2.00E-25  | 2  |
| <i>Bacteroides</i> sp. D2                           | GCF_000159075.2 | WP_009001080.1 | 2.00E-25  | 2  |
| <i>Bacteroides</i> sp. D22                          | GCF_000163675.1 | WP_004317151.1 | 2.00E-25  | 2  |
| <i>Bacteroides</i> sp. HMSC067B03                   | GCF_001811315.1 | WP_055295521.1 | 1.00E-103 | 9  |
| <i>Bacteroides</i> sp. HMSC073E02                   | GCF_001815255.1 | WP_007480249.1 | 7.00E-103 | 5  |
| <i>Bacteroides</i> sp. HMSC073E02                   | GCF_001815255.1 | WP_070782541.1 | 0         | 7  |
| <i>Bacteroides</i> sp. HPS0048                      | GCF_000382465.1 | WP_002558314.1 | 4.00E-25  | 2  |
| <i>Bacteroides</i> sp. Marseille-P2653              | GCF_900155865.1 | WP_007480249.1 | 7.00E-103 | 16 |
| <i>Bacteroides</i> sp. Marseille-P2653              | GCF_900155865.1 | WP_077152863.1 | 5.00E-25  | 2  |
| <i>Bacteroides</i> sp. Marseille-P3108              | GCF_900108345.1 | WP_071148900.1 | 0         | 6  |
| <i>Bacteroides</i> sp. Marseille-P3108              | GCF_900108345.1 | WP_071150249.1 | 3.00E-26  | 7  |
| <i>Bacteroides</i> sp. Marseille-P3132              | GCF_900130125.1 | WP_073343607.1 | 3.00E-36  | 6  |
| <i>Bacteroides</i> sp. Marseille-P3132              | GCF_900130125.1 | WP_073348178.1 | 7.00E-101 | 8  |
| <i>Bacteroides</i> sp. Marseille-P3208T             | GCF_900128495.1 | WP_071150249.1 | 3.00E-26  | 7  |
| <i>Bacteroides</i> sp. UW                           | GCF_000785025.1 | WP_032530216.1 | 1.00E-177 | 12 |
| <i>Bacteroides stercoris</i> CC31F                  | GCF_000413395.1 | WP_016662012.1 | 9.00E-104 | 9  |
| <i>Bacteroides thetaiotaomicron</i>                 | GCF_001405095.1 | WP_032851361.1 | 0         | 6  |
| <i>Bacteroides thetaiotaomicron</i>                 | GCF_900109385.1 | WP_065540254.1 | 6.00E-103 | 8  |
| <i>Bacteroides thetaiotaomicron</i> dnLKV9          | GCF_000403155.2 | WP_016268162.1 | 3.00E-180 | 6  |
| <i>Bacteroides uniformis</i>                        | GCF_001406135.1 | WP_007565622.1 | 0         | 15 |
| <i>Bacteroides uniformis</i>                        | GCF_001406135.1 | WP_041579541.1 | 0         | 12 |
| <i>Bacteroides uniformis</i>                        | GCF_001406635.1 | WP_007565622.1 | 0         | 14 |
| <i>Bacteroides uniformis</i>                        | GCF_900107315.1 | WP_005647591.1 | 0         | 5  |
| <i>Bacteroides uniformis</i> ATCC 8492              | GCF_000154205.1 | WP_005647591.1 | 0         | 5  |
| <i>Bacteroides uniformis</i> CL03T00C23             | GCF_000273785.1 | WP_032532373.1 | 2.00E-102 | 11 |
| <i>Bacteroides uniformis</i> CL03T12C37             | GCF_000273275.1 | WP_032532373.1 | 2.00E-102 | 11 |
| <i>Bacteroides uniformis</i> dnLKV2                 | GCF_000403175.1 | WP_035458146.1 | 7.00E-103 | 8  |
| <i>Bacteroides vulgatus</i> PC510                   | GCF_000178195.1 | WP_032938614.1 | 0         | 5  |
| <i>Bacteroides vulgatus</i> str. 3975 RP4           | GCF_000699865.1 | WP_004319196.1 | 0         | 6  |
| <i>Bacteroides vulgatus</i> str. 3975 RP4           | GCF_000699865.1 | WP_032953256.1 | 0         | 3  |
| <i>Bacteroides xylanisolvens</i>                    | GCF_001405055.1 | WP_004317151.1 | 2.00E-25  | 2  |
| <i>Bacteroides xylanisolvens</i>                    | GCF_900107825.1 | WP_004317151.1 | 2.00E-25  | 2  |
| <i>Bacteroides xylanisolvens</i>                    | GCF_900114865.1 | WP_004317151.1 | 2.00E-25  | 2  |
| <i>Bacteroides xylanisolvens</i> CL03T12C04         | GCF_000273315.1 | WP_004317151.1 | 2.00E-25  | 2  |
| <i>Bacteroides xylanisolvens</i> CL03T12C04         | GCF_000273315.1 | WP_029427371.1 | 0         | 16 |
| <i>Bacteroides xylanisolvens</i> CL03T12C04         | GCF_000273315.1 | WP_032532373.1 | 2.00E-102 | 11 |
| <i>Bacteroides xylanisolvens</i> SD CC 1b           | GCF_000178215.1 | WP_004316061.1 | 4.00E-110 | 2  |
| <i>Bacteroides xylanisolvens</i> SD CC 1b           | GCF_000178215.1 | WP_004317151.1 | 2.00E-25  | 2  |
| <i>Bacteroides xylanisolvens</i> SD CC 1b           | GCF_000577295.1 | WP_004316061.1 | 4.00E-110 | 6  |
| <i>Bacteroides xylanisolvens</i> SD CC 1b           | GCF_000577295.1 | WP_004317151.1 | 2.00E-25  | 2  |
| <i>Bacteroides xylanisolvens</i> SD CC 2a           | GCF_000178295.1 | WP_004316061.1 | 4.00E-110 | 3  |
| <i>Bacteroides xylanisolvens</i> SD CC 2a           | GCF_000178295.1 | WP_004317151.1 | 2.00E-25  | 2  |
| <i>Bacteroides xylanisolvens</i> SD CC 2a           | GCF_000577955.1 | WP_004316061.1 | 4.00E-110 | 7  |
| <i>Bacteroides xylanisolvens</i> SD CC 2a           | GCF_000577955.1 | WP_004317151.1 | 2.00E-25  | 2  |
| <i>Parabacteroides distasonis</i> CL03T12C09        | GCF_000307455.1 | WP_029427371.1 | 0         | 16 |
| <i>Parabacteroides distasonis</i> str. 3999B T(B) 4 | GCF_000699905.1 | WP_034503414.1 | 9.00E-104 | 10 |
| <i>Parabacteroides goldsteinii</i>                  | GCF_001039445.1 | WP_007565622.1 | 0         | 20 |
| <i>Parabacteroides goldsteinii</i>                  | GCF_001039445.1 | WP_046147928.1 | 8.00E-28  | 2  |
| <i>Parabacteroides goldsteinii</i> CL02T12C30       | GCF_000307395.1 | WP_007654016.1 | 7.00E-109 | 13 |
| <i>Parabacteroides goldsteinii</i> dnLKV18          | GCF_000403825.2 | WP_007565622.1 | 0         | 9  |
| <i>Parabacteroides goldsteinii</i> dnLKV18          | GCF_000403825.2 | WP_032581328.1 | 4.00E-103 | 4  |
| <i>Parabacteroides gordonii</i> DSM 23371           | GCF_000428565.1 | WP_007480249.1 | 7.00E-103 | 9  |
| <i>Parabacteroides gordonii</i> DSM 23371           | GCF_000428565.1 | WP_028728892.1 | 0         | 16 |
| <i>Parabacteroides gordonii</i> DSM 23371           | GCF_000428565.1 | WP_028729533.1 | 6.00E-103 | 5  |
| <i>Parabacteroides gordonii</i> MS-1                | GCF_000969825.1 | WP_007480249.1 | 7.00E-103 | 9  |
| <i>Parabacteroides gordonii</i> MS-1                | GCF_000969825.1 | WP_028728892.1 | 0         | 16 |
| <i>Parabacteroides gordonii</i> MS-1                | GCF_000969825.1 | WP_028729533.1 | 6.00E-103 | 5  |
| <i>Parabacteroides merdae</i> CL03T12C32            | GCF_000307345.1 | WP_005647591.1 | 0         | 25 |
| <i>Parabacteroides merdae</i> CL03T12C32            | GCF_000307345.1 | WP_034503414.1 | 9.00E-104 | 14 |
| <i>Parabacteroides</i> sp. ASF519                   | GCF_000364265.1 | WP_032581328.1 | 4.00E-103 | 4  |
| <i>Parabacteroides</i> sp. D13                      | GCF_000162275.1 | WP_009017658.1 | 0         | 8  |
| <i>Paraprevotella xylaniphila</i> YIT 11841         | GCF_000205165.1 | WP_040602870.1 | 0         | 11 |
| <i>Porphyromonas endodontalis</i> ATCC 35406        | GCF_000174815.1 | WP_040581485.1 | 4.00E-25  | 3  |

Supplemental Data Table 6

| Bacterial species and strains                             | Genotype                                                                                                                                                     | Notes                                                                                                                                                         |
|-----------------------------------------------------------|--------------------------------------------------------------------------------------------------------------------------------------------------------------|---------------------------------------------------------------------------------------------------------------------------------------------------------------|
| <i>Escherichia coli</i> EC1000                            | F <sup>-</sup> <i>metA</i> (Δ <i>mir-bcdRMS-mecB</i> C) o80[ <i>hlsZAM15</i> <i>AlacX74</i> <i>recA1</i> <i>endA1</i> <i>araD139</i> <i>Δ(ara, leu)</i> 7697 |                                                                                                                                                               |
| <i>Escherichia coli</i> S17-1 <i>pir</i>                  | <i>galI</i> <i>galK</i> $\lambda$ - <i>rpsL</i> . <i>nupG</i> <i>pir-116</i> (DHFR)                                                                          |                                                                                                                                                               |
| <i>B. fragilis</i> NCTC 9343 <i>tdk</i>                   | BF9343_0556, F <sub>UdR</sub> <sup>R</sup>                                                                                                                   | Parental deletion background                                                                                                                                  |
| <i>B. fragilis</i> NCTC 9343 <i>tdk tssC</i>              | BF9343_1941, F <sub>UdR</sub> <sup>R</sup>                                                                                                                   | Type VI secretion system inactive                                                                                                                             |
| <i>B. fragilis</i> NCTC 9343 <i>tdk e-16</i>              | BF9343_1936-7, F <sub>UdR</sub> <sup>R</sup>                                                                                                                 | E-16 mutant ( <i>bte-11</i> )                                                                                                                                 |
| <i>B. fragilis</i> NCTC 9343 <i>tdk e-17ab</i>            | BF9343_1926-8, F <sub>UdR</sub> <sup>R</sup>                                                                                                                 | E-17ab mutant ( <i>bte-12ab</i> )                                                                                                                             |
| <i>B. fragilis</i> NCTC 9343 <i>tdk rAID-1 orf1</i>       | BF9343_1926-8, F <sub>UdR</sub> <sup>R</sup>                                                                                                                 | rAID-1 orf1 mutant                                                                                                                                            |
| <i>B. fragilis</i> 638R                                   | Wildtype, F <sub>UdR</sub> <sup>R</sup>                                                                                                                      | Gift from Sears lab, Johns Hopkins University                                                                                                                 |
| <i>B. fragilis</i> 638R <i>tdk</i>                        | BF638R_0630, F <sub>UdR</sub> <sup>R</sup>                                                                                                                   | Parental deletion background, retains <i>tdk</i> resistance                                                                                                   |
| <i>B. fragilis</i> 638R <i>tdk o16</i>                    | BF638R_2042, F <sub>UdR</sub> <sup>R</sup>                                                                                                                   | Orphan 16 mutant                                                                                                                                              |
| <i>B. fragilis</i> 638R <i>tdk o17ab</i>                  | BF638R_2053-4, F <sub>UdR</sub> <sup>R</sup>                                                                                                                 | Orphan 17ab mutant                                                                                                                                            |
| <i>B. fragilis</i> 638R <i>tdk o16 o17ab</i>              | BF638R_2042, BF638R_2053-4, F <sub>UdR</sub> <sup>R</sup>                                                                                                    | Orphan 16/17ab double mutant                                                                                                                                  |
| <i>Bacteroides ovatus</i> 8483 <i>tdk</i>                 | F <sub>UdR</sub> <sup>R</sup>                                                                                                                                | Parental                                                                                                                                                      |
| <i>Bacteroides ovatus</i> 3725 D1 <i>iv</i>               | F <sub>UdR</sub> <sup>R</sup>                                                                                                                                | Wildtype strain, naturally tet resistant.                                                                                                                     |
| <i>Bacteroides ovatus</i> 3725 D1 <i>iv tdk</i>           | M088_RS16410, F <sub>UdR</sub> <sup>R</sup>                                                                                                                  | Parental deletion background                                                                                                                                  |
| <i>Bacteroides ovatus</i> 3725 D1 <i>iv tdk o16</i>       | M088_RS11470, F <sub>UdR</sub> <sup>R</sup>                                                                                                                  | Orphan 16 mutant                                                                                                                                              |
| <i>Bacteroides ovatus</i> 3725 D1 <i>iv tdk o17ab</i>     | M088_RS11485-90, F <sub>UdR</sub> <sup>R</sup>                                                                                                               | Orphan 17ab mutant                                                                                                                                            |
| <i>Bacteroides ovatus</i> 3725 D1 <i>iv tdk o16 o17ab</i> | M088_RS11470, M088_RS11485-90, F <sub>UdR</sub> <sup>R</sup>                                                                                                 | Orphan 16/17ab double mutant                                                                                                                                  |
| <i>Bacteroides xylanisolvens</i> H204                     | F <sub>UdR</sub> <sup>R</sup>                                                                                                                                | Wildtype strain, naturally tet resistant                                                                                                                      |
| <i>Bacteroides xylanisolvens</i> H207                     | F <sub>UdR</sub> <sup>R</sup>                                                                                                                                | Wildtype strain, naturally tet resistant                                                                                                                      |
| <i>Bacteroides xylanisolvens</i> H207 <i>tdk</i>          | E0JDMPIF_00853, F <sub>UdR</sub> <sup>R</sup>                                                                                                                | Parental deletion background, naturally tet resistant                                                                                                         |
| <i>Bacteroides xylanisolvens</i> H207 <i>tdk o16</i>      | E0JDMPIF_04289, F <sub>UdR</sub> <sup>R</sup>                                                                                                                | Orphan 16 mutant, naturally tet resistant                                                                                                                     |
| <i>Bacteroides fragilis</i> YCH46                         | F <sub>UdR</sub> <sup>R</sup>                                                                                                                                | Wildtype strain                                                                                                                                               |
| <i>Bacteroides fragilis</i> YCH46 <i>tdk</i>              | BF0659, F <sub>UdR</sub> <sup>R</sup>                                                                                                                        | Parental deletion background                                                                                                                                  |
| <i>Bacteroides fragilis</i> YCH46 <i>tdk GA1 tssR</i>     | BF2842, F <sub>UdR</sub> <sup>R</sup>                                                                                                                        | BF2842 ( <i>tssR</i> ) mutant, GA1 T6SS inactivating                                                                                                          |
| Plasmids                                                  | Purpose                                                                                                                                                      | Reference/Source                                                                                                                                              |
| pKNOCK-erm                                                | Suicide vector, allelic exchange                                                                                                                             | Gift from Goodman lab, Yale. PMID: 18611383                                                                                                                   |
| pKNOCK- <i>tdk</i> -BF9343_0556                           | Deletion of thymidine kinase gene from <i>B. fragilis</i> 638R                                                                                               | Gift from Goodman lab, Yale. PMID: 26957597                                                                                                                   |
| pKNOCK-Bov- <i>tdk</i>                                    | Deletion of thymidine kinase gene M088_RS16410 from <i>B. ovatus</i> 3725 D1 <i>iv</i>                                                                       | This study                                                                                                                                                    |
| pKNOCK-Bxy- <i>tdk</i>                                    | Deletion of thymidine kinase gene E0JDMPIF_00853 from <i>B. xylanisolvens</i> H207                                                                           | This study                                                                                                                                                    |
| pExchange <i>tdk</i>                                      | Suicide vector, allelic exchange                                                                                                                             | Gift from Goodman lab, Yale. PMID: 18611383                                                                                                                   |
| pExchange <i>tdk</i> _BF638R_o16                          | Deletion of BF638R_2042 from <i>B. fragilis</i> 638R                                                                                                         | This study                                                                                                                                                    |
| pExchange <i>tdk</i> _BF638R_o17ab                        | Deletion of BF638R_2053-4 from <i>B. fragilis</i> 638R                                                                                                       | Gift from Goodman lab, Yale. PMID: 18611383                                                                                                                   |
| pExchange <i>tdk</i> _Bov3725_o16                         | Deletion of M088_RS11470 from <i>B. ovatus</i> 3725 D1 <i>iv</i>                                                                                             | Gift from Goodman lab, Yale. PMID: 18611383                                                                                                                   |
| pExchange <i>tdk</i> _Bov3725_o17ab                       | Deletion of M088_RS11485-90 from <i>B. ovatus</i> 3725 D1 <i>iv</i>                                                                                          | Gift from Goodman lab, Yale. PMID: 18611383                                                                                                                   |
| pExchange <i>tdk</i> _BxyH207_o16                         | Deletion of E0JDMPIF_04289 from <i>B. xylanisolvens</i> H207                                                                                                 | Gift from Goodman lab, Yale. PMID: 18611383                                                                                                                   |
| pNBU2_erm                                                 | To confer antibiotic resistance to strains following chromosomal insertion at <i>Bacteroides</i> NBU2 att sites                                              | Gift from Goodman lab, Yale. PMID: 26957597                                                                                                                   |
| pNBU2_tet                                                 | To confer antibiotic resistance to strains following chromosomal insertion at <i>Bacteroides</i> NBU2 att sites                                              | Gift from Goodman lab, Yale. PMID: 26957597                                                                                                                   |
| pNBU2_erm_us1311                                          | For constitutive gene expression following chromosomal insertion at <i>Bacteroides</i> NBU2 att sites, used in                                               | Gift from Goodman lab, Yale. PMID: 24439897                                                                                                                   |
| pSchaB2-V                                                 | For inducible expression of proteins in <i>Escherichia coli</i>                                                                                              | PMID: 15925406                                                                                                                                                |
| pSchaB2-V-BF2850-toxCT                                    | For inducible expression of the C-terminal toxin domain (residue 1353 to 1481) of BF2850 in <i>E. coli</i>                                                   | PMID: 15925406                                                                                                                                                |
| pPSV39-CV                                                 | For inducible expression of proteins in <i>Escherichia coli</i>                                                                                              | PMID: 23954347                                                                                                                                                |
| pPSV39-BF2851-CV                                          | For inducible expression of BF2851 cognate immunity in <i>E. coli</i>                                                                                        | PMID: 23954347                                                                                                                                                |
| pPSV39-CV-BF9343_1657=CV                                  | For inducible expression of BF9343_1657 orphan immunity in <i>E. coli</i>                                                                                    | PMID: 23954347                                                                                                                                                |
| Primers                                                   | Sequence                                                                                                                                                     | Purpose                                                                                                                                                       |
| E0JDMPIF_03980 F                                          | GAGAGAAACITTTGTCATCCCC                                                                                                                                       | qPCR, <i>B. xylanisolvens</i> H207                                                                                                                            |
| E0JDMPIF_03980 R                                          | GAGACGCTCTTTGAAGAATTC                                                                                                                                        | qPCR, <i>B. xylanisolvens</i> H207                                                                                                                            |
| BACOVA_04916 F                                            | GTTTGGCGGAGGAATGATGTC                                                                                                                                        | qPCR, <i>B. ovatus</i>                                                                                                                                        |
| BACOVA_04916 R                                            | CATCGTCTTCCAAAGAAAGTCACATGA                                                                                                                                  | qPCR, <i>B. ovatus</i>                                                                                                                                        |
| BF638R_1320 F                                             | AGGAGGCATCGGGATTITTTGAC                                                                                                                                      | qPCR, <i>B. fragilis</i>                                                                                                                                      |
| BF638R_1320 R                                             | CAATACGCTATCTCCTGTGGAAGTC                                                                                                                                    | qPCR, <i>B. fragilis</i>                                                                                                                                      |
| BF638R_o16_left_fwd                                       | gaagagagaataaacttgaggagcctaattgttagagagcaac                                                                                                                  | For deletion of BF638R_2042 by Gibson Assembly into BamHI and Sall linearized pExchange <i>tdk</i>                                                            |
| BF638R_o16_left_rev                                       | tcacagggtctatccctactctcaaaaacaaatctcc                                                                                                                        | For deletion of BF638R_2042 by Gibson Assembly into BamHI and Sall linearized pExchange <i>tdk</i>                                                            |
| BF638R_o16_right_fwd                                      | atggtagagacccttgaaatgcaaacatttattatc                                                                                                                         | For deletion of BF638R_2042 by Gibson Assembly into BamHI and Sall linearized pExchange <i>tdk</i>                                                            |
| BF638R_o16_right_rev                                      | eggcgcctgttagctgacattttataaaatccggctggc                                                                                                                      | For deletion of BF638R_2042 by Gibson Assembly into BamHI and Sall linearized pExchange <i>tdk</i>                                                            |
| BF638R_o17ab_left_fwd                                     | gaagagagaataaacttgaggagcctaattgttagagagcaac                                                                                                                  | For deletion of BF638R_2053-4 by Gibson Assembly into BamHI and Sall linearized pExchange <i>tdk</i>                                                          |
| BF638R_o17ab_left_rev                                     | gtcatctctcctttatctgtttttgttttc                                                                                                                               | For deletion of BF638R_2053-4 by Gibson Assembly into BamHI and Sall linearized pExchange <i>tdk</i>                                                          |
| BF638R_o17ab_right_fwd                                    | caatgaagaagcagactatgacagaaaaaacaggtg                                                                                                                         | For deletion of BF638R_2053-4 by Gibson Assembly into BamHI and Sall linearized pExchange <i>tdk</i>                                                          |
| BF638R_o17ab_right_rev                                    | eggcgcctgttagctgacattttataaaatccggctggc                                                                                                                      | For deletion of BF638R_2053-4 by Gibson Assembly into BamHI and Sall linearized pExchange <i>tdk</i>                                                          |
| Bxy_H207_o16_#1                                           | TCAGTAACGGATCCCGACCGCACTGTGTGAGGACCCATTAC                                                                                                                    | For deletion of E0JDMPIF_04289 by Gibson Assembly into BamHI and Sall linearized pKNOCK                                                                       |
| Bxy_H207_o16_#2                                           | CGTCCAGGAGGCGCTCTCTCTAGCTCTCTGTATGTTGG                                                                                                                       | For deletion of E0JDMPIF_00853 by Gibson Assembly into BamHI and Sall linearized pKNOCK                                                                       |
| Bxy_H207_o16_#3                                           | CTAGAAGAAGGCGCTCGTCCAGGAGGGAAGATGAGC                                                                                                                         | For deletion of E0JDMPIF_00853 by Gibson Assembly into BamHI and Sall linearized pKNOCK                                                                       |
| Bxy_H207_o16_#4                                           | TCAGAAATGTGCACTAGCCATGGGAAATCGATAATCAGGAAGC                                                                                                                  | For deletion of E0JDMPIF_00853 by Gibson Assembly into BamHI and Sall linearized pExchange <i>tdk</i>                                                         |
| Bxy_H207_o16_#1                                           | TCAGTAACGGATCCCGACCGCACTGTGTGAGGACCCATTAC                                                                                                                    | For deletion of E0JDMPIF_04289 by Gibson Assembly into BamHI and Sall linearized pExchange <i>tdk</i>                                                         |
| Bxy_H207_o16_#2                                           | GACCCCACTCGGAGCGCGCAAAAACAATGCCTCTTCAAAAAATAAATGATTC                                                                                                         | For deletion of E0JDMPIF_04289 by Gibson Assembly into BamHI and Sall linearized pExchange <i>tdk</i>                                                         |
| Bxy_H207_o16_#3                                           | CATTTGTTTTGCTGGCTCGGATGGGTCAGATAATAAATACTAGTTG                                                                                                               | For deletion of E0JDMPIF_04289 by Gibson Assembly into BamHI and Sall linearized pExchange <i>tdk</i>                                                         |
| Bxy_H207_o16_#4                                           | TCAGAAATGTGCACTAGCCATGGGAAATCGATAATCAGGAAGC                                                                                                                  | For deletion of E0JDMPIF_04289 by Gibson Assembly into BamHI and Sall linearized pExchange <i>tdk</i>                                                         |
| BOV_tdk_Sall_F1                                           | CTGAAGATCGAC GTGATCTCCGCCAAATCAGATC                                                                                                                          | For deletion of M088_RS16410 from <i>B. ovatus</i> 3725 D1 <i>iv</i> by SOE and restriction-ligation cloning into BamHI and Sall linearized pKNOCK            |
| BOV_tdk_SOE_R1                                            | GAGATTTTTGGTTTTCTGATATAAATAATGCCTTCCATCAATCTGTTTCTTTATAGAGT                                                                                                  | For deletion of M088_RS16410 from <i>B. ovatus</i> 3725 D1 <i>iv</i> by SOE and restriction-ligation cloning into BamHI and Sall linearized pKNOCK            |
| BOV_tdk_SOE_F2                                            | ACTCTATAAAGAAACAGATATAGGAAAGC CATATTTATTTAATCAAGAAACACAAAF                                                                                                   | For deletion of M088_RS16410 from <i>B. ovatus</i> 3725 D1 <i>iv</i> by SOE and restriction-ligation cloning into BamHI and Sall linearized pKNOCK            |
| BOV_tdk_BamHI_R2                                          | CAACAAGATCC GAAGGTATCCTGTATGATTTGTACGAT                                                                                                                      | For deletion of M088_RS16410 from <i>B. ovatus</i> 3725 D1 <i>iv</i> by SOE and restriction-ligation cloning into BamHI and Sall linearized pKNOCK            |
| Bov_3725_o16_#1                                           | TCAGTAACGGATCCAAATCGGGAACGACCCACCGCT                                                                                                                         | For deletion of M088_RS11470 by Gibson Assembly into BamHI and Sall linearized pExchange <i>tdk</i>                                                           |
| Bov_3725_o16_#2                                           | CCCATCGGAGCGAGCGATAAAGATAACACTCACT                                                                                                                           | For deletion of M088_RS11470 by Gibson Assembly into BamHI and Sall linearized pExchange <i>tdk</i>                                                           |
| Bov_3725_o16_#3                                           | CTTTCATCCGGCTCCTCCGATGGGAGTCAGATAATGAAGTTC                                                                                                                   | For deletion of M088_RS11470 by Gibson Assembly into BamHI and Sall linearized pExchange <i>tdk</i>                                                           |
| Bov_3725_o16_#4                                           | TCAGAAATGTGCACTAGCCATGGGAAATCGATAATCAGGAAGC                                                                                                                  | For deletion of M088_RS11470 by Gibson Assembly into BamHI and Sall linearized pExchange <i>tdk</i>                                                           |
| Bov_3725_o17ab_#1                                         | TCAGTAACGGATCCCAATGATGACTACTTATAAGGAATG                                                                                                                      | For deletion of M088_RS11485-90 by Gibson Assembly into BamHI and Sall linearized pExchange <i>tdk</i>                                                        |
| Bov_3725_o17ab_#2                                         | CTCTCTGTATTGCTGCCAATGATGACTACTTATAAGGAATG                                                                                                                    | For deletion of M088_RS11485-90 by Gibson Assembly into BamHI and Sall linearized pExchange <i>tdk</i>                                                        |
| Bov_3725_o17ab_#3                                         | GTATCTGAAATGGGCTAGGCAAAATACAGGAAGAATAACAATAAACAAG                                                                                                            | For deletion of M088_RS11485-90 by Gibson Assembly into BamHI and Sall linearized pExchange <i>tdk</i>                                                        |
| Bov_3725_o17ab_#4                                         | TCAGAAATGGGCGCGCAATCGATCTGACTAGACTGAATATAAG                                                                                                                  | For deletion of M088_RS11485-90 by Gibson Assembly into BamHI and Sall linearized pExchange <i>tdk</i>                                                        |
| YCH46_BF2842_LEFT_fwd                                     | gaagagagaataaacttgaggagcctaattgttagagagcaac                                                                                                                  | For deletion of BF2842 (GA1 TssR) by Gibson Assembly into BamHI and Sall linearized pExchange <i>tdk</i>                                                      |
| YCH46_BF2842_LEFT_rev                                     | ttacagattgttttcaatttataaaatctgtgtgac                                                                                                                         | For deletion of BF2842 (GA1 TssR) by Gibson Assembly into BamHI and Sall linearized pExchange <i>tdk</i>                                                      |
| YCH46_BF2842_RIGHT_fwd                                    | atgaagaacatfactgtaaaataaaatggaaccacac                                                                                                                        | For deletion of BF2842 (GA1 TssR) by Gibson Assembly into BamHI and Sall linearized pExchange <i>tdk</i>                                                      |
| YCH46_BF2842_RIGHT_rev                                    | eggcgcctgttagctgacattttataaaatccggctggc                                                                                                                      | For deletion of BF2842 (GA1 TssR) by Gibson Assembly into BamHI and Sall linearized pExchange <i>tdk</i>                                                      |
| BF9343_1657_LEFT_fwd                                      | TCAGTAACGGATCCCGACCGCACTGTGTGAGGACCCATTAC                                                                                                                    | For deletion of <i>B. fragilis</i> 9343 rAID-1 orf1 (BF9343_1657) by SOE and restriction-ligation cloning into BamHI and Sall linearized pExchange <i>tdk</i> |
| BF9343_1657_LEFT_rev                                      | CCGTTGTAACGTTCAGCTCCGGAAATCGAAATGACCCGAC                                                                                                                     | For deletion of <i>B. fragilis</i> 9343 rAID-1 orf1 (BF9343_1657) by SOE and restriction-ligation cloning into BamHI and Sall linearized pExchange <i>tdk</i> |
| BF9343_1657_RIGHT_fwd                                     | CCGAACTGACGACGCTTACAAAGGATCTCAATTTGGAACTATATG                                                                                                                | For deletion of <i>B. fragilis</i> 9343 rAID-1 orf1 (BF9343_1657) by SOE and restriction-ligation cloning into BamHI and Sall linearized pExchange <i>tdk</i> |
| BF9343_1657_RIGHT_rev                                     | TCAGAAATGTGCACTAGCCATGGGAAATCGATAATCAGGAAGC                                                                                                                  | For deletion of <i>B. fragilis</i> 9343 rAID-1 orf1 (BF9343_1657) by SOE and restriction-ligation cloning into BamHI and Sall linearized pExchange <i>tdk</i> |
| BF9343_1657_F_Sael_hcpRBS                                 | TCAAGTACTAGACCTACCGGAGGAAAGATGAGTAAAGTAAATGGGTTGGC                                                                                                           | For inducible expression of orphan immunity from <i>B. fragilis</i> NCTC 9343 from pPSV39-CV (untagged), RBS from <i>P. aeruginosa</i> hcp1                   |
| BF9343_1657_R_Xba_1_NS                                    | TCATCAGTACTAGATCTGCAATATAAGTTTCCAAATAATGAATACC                                                                                                               | For inducible expression of orphan immunity from <i>B. fragilis</i> NCTC 9343 from pPSV39-CV (untagged), RBS from <i>P. aeruginosa</i> hcp1                   |
| YCH46_BF2851_F_Sael_hcpRBS                                | CTGAA GAGCTC <i>ACGGGAGGAAAG</i> ATGAATAAAATAATGATTTGGGTTGGTC                                                                                                | For inducible expression of cognate immunity from <i>B. fragilis</i> YCH46 into pPSV39-CV (VsvG-tagged), RBS from <i>P. aeruginosa</i> hcp1                   |
| YCH46_BF2851_R_Xba1-ns                                    | CAACA tetaq CTATCCCGCTATATATGTTCTTAAATAATG                                                                                                                   | For inducible expression of cognate immunity from <i>B. fragilis</i> YCH46 into pPSV39-CV (VsvG-tagged), RBS from <i>P. aeruginosa</i> hcp1                   |
| YCH46_BF2850F_Nde I                                       | TAGTACACTACATATGGCGTCTCCATGGGACG                                                                                                                             | For inducible expression of the C-terminal toxin domain of <i>B. fragilis</i> YCH46 BF2850 (untagged)                                                         |
| YCH46_BF2850_Xba_1_STOP                                   | TCAATCAGTACTAGATTTTATTAAGAATACTACTACATGC                                                                                                                     | For inducible expression of the C-terminal toxin domain of <i>B. fragilis</i> YCH46 BF2850 (untagged)                                                         |
